# Supplementary material
Source: HighWire-hosted journal article supplement (https://thorax.bmj.com/content/74/9/875)

from the assessed regression models

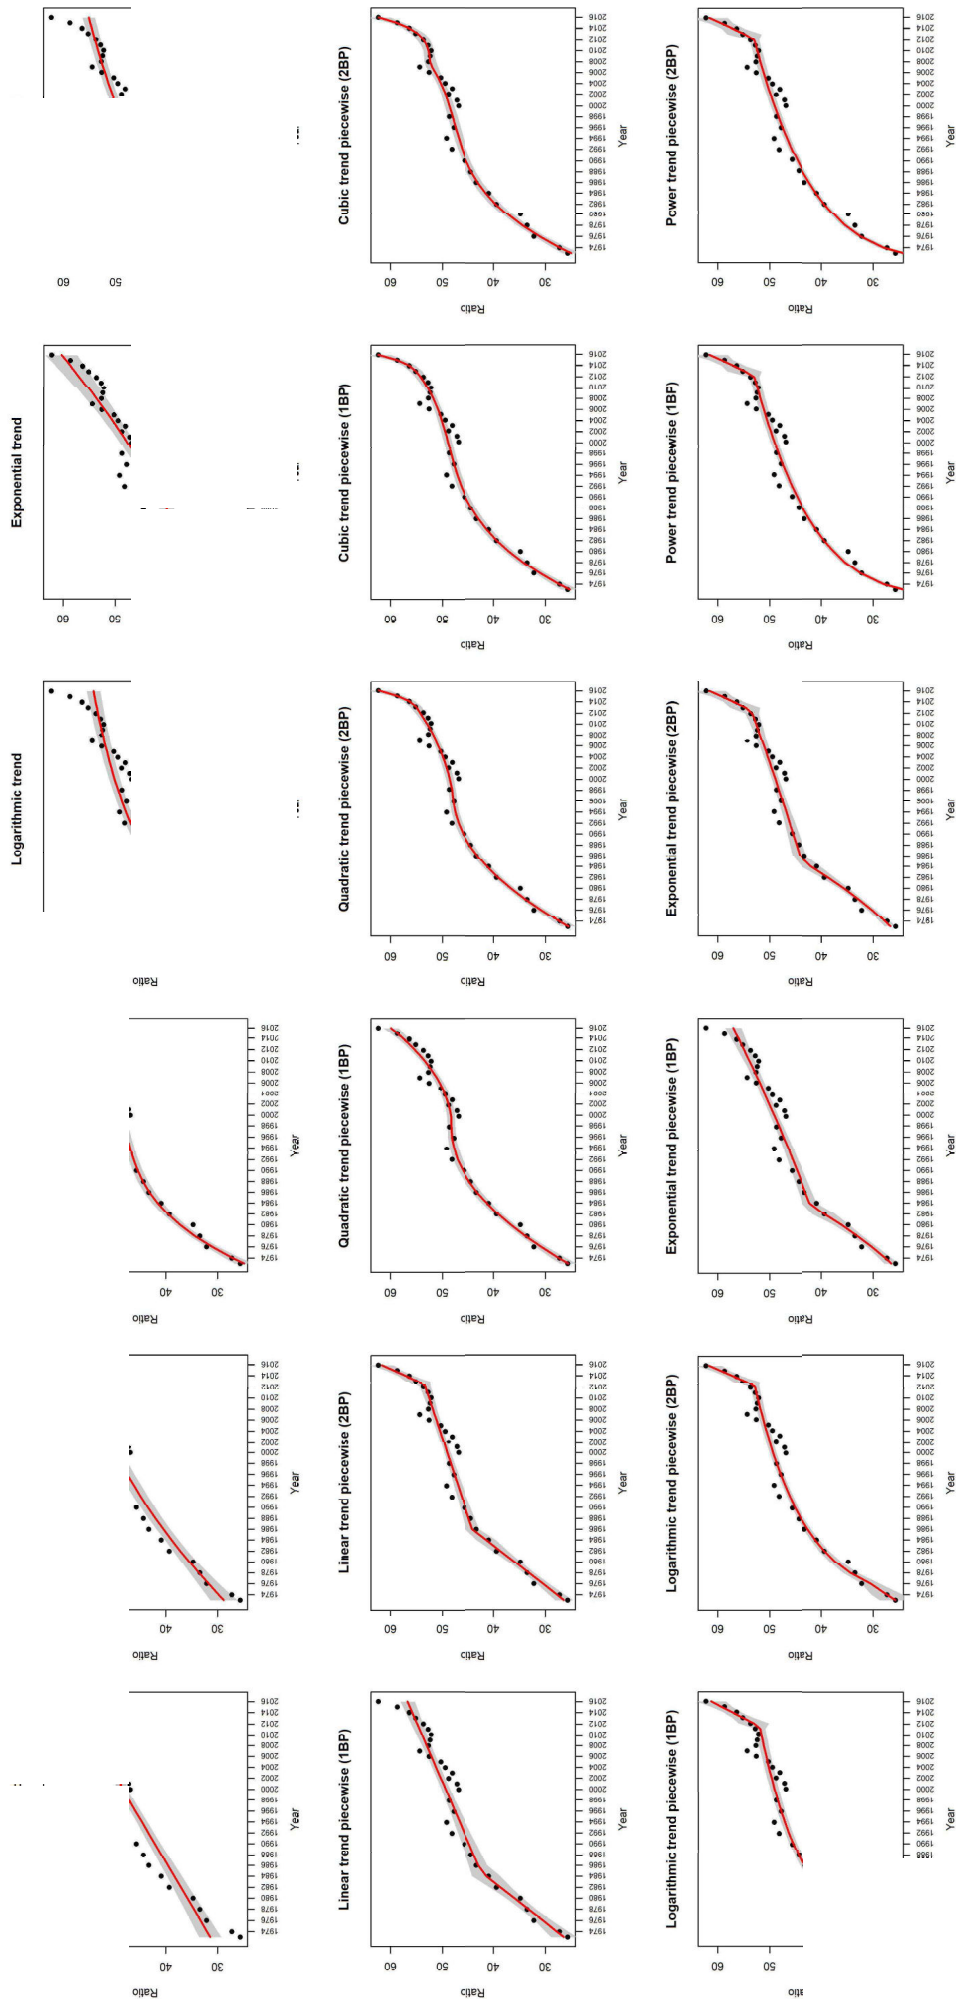

Supplement: inline-supplementary-material-1 [file inline-supplementary-material-1.pdf]
